# Supplementary material for: SMRT sequencing of the Oryza rufipogon genome reveals the genomic basis of rice adaptation
Source: PubMed Central journal article supplement (PMC7138787; doi:10.1038/s42003-020-0890-8), 2020-04-07
Supplement: 42003_2020_890_MOESM1_ESM.pdf [file 42003_2020_890_MOESM1_ESM.pdf]

## Supplementary Figures

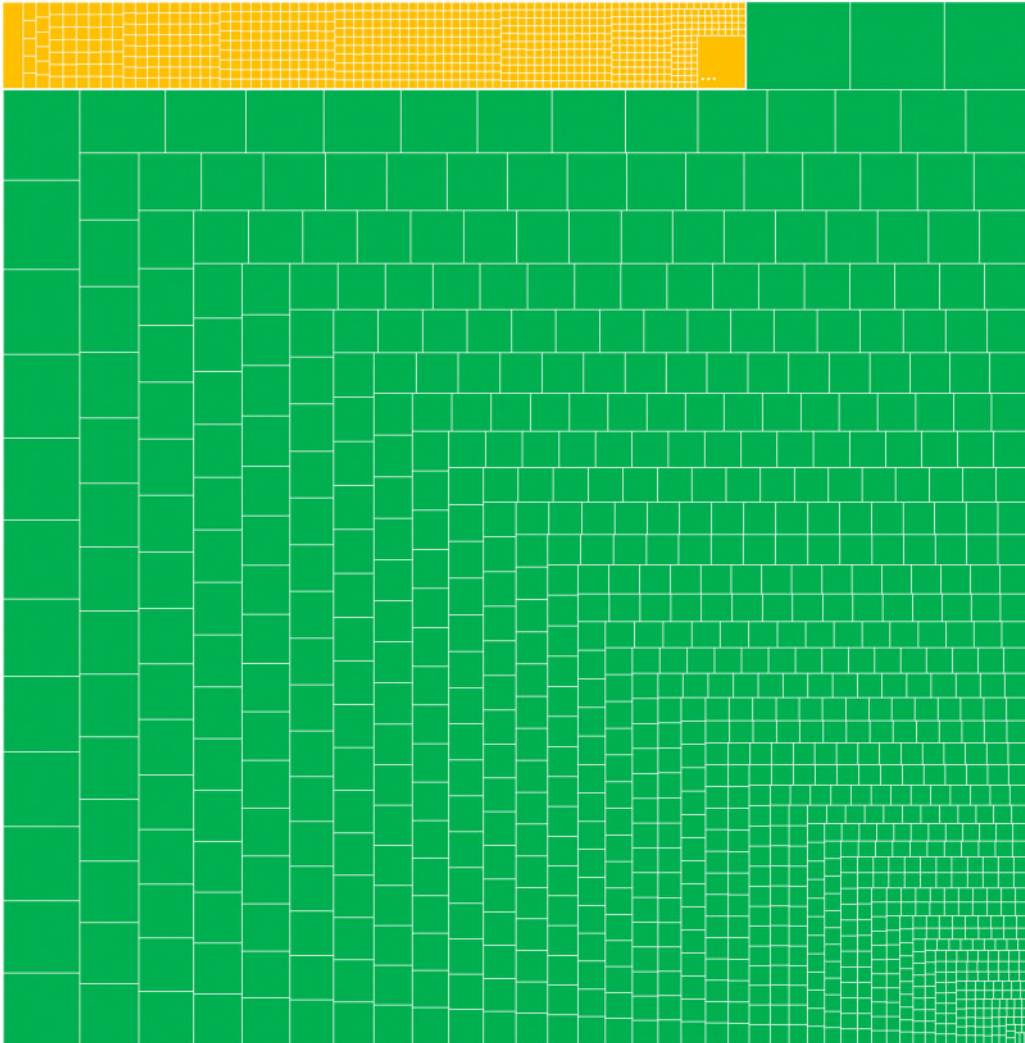

**Supplementary Figure 1. Tree map of haplotigs (yellow) and p-contigs (green) scaled by length.**

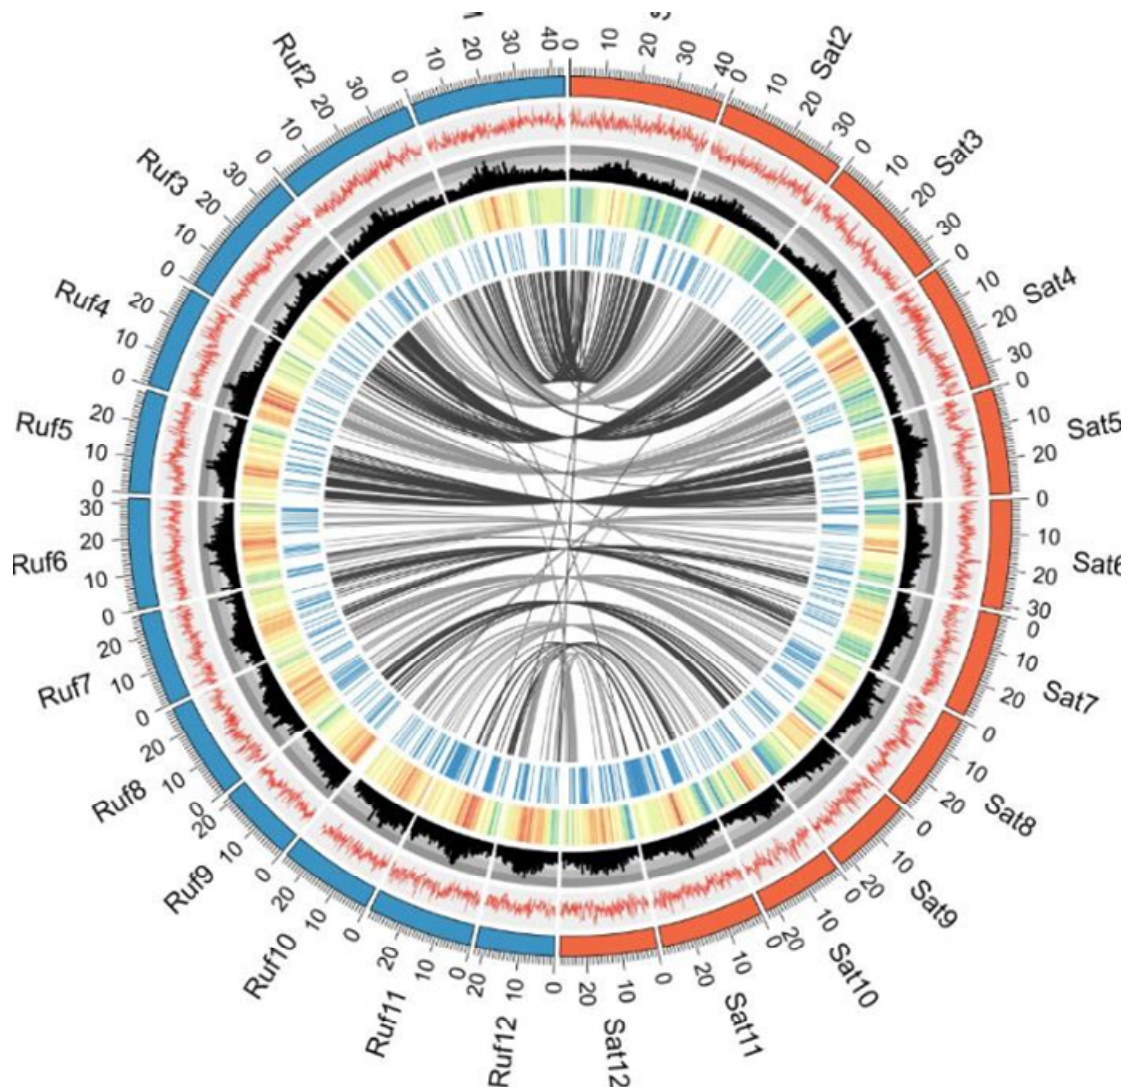

**Supplementary Figure 2. Synteny comparisons and genome features of *O. rufipogon* and *O. sativa*.** Tracks from outside to inside are the 12 chromosomes of *O. rufipogon* and *O. sativa*, GC content, transposable element (TE) density, gene density (density measured in 100-Kb sliding windows), and distribution of NBS genes. The syntenic blocks between *O. rufipogon* and *O. sativa* chromosomes are displayed with connecting lines in different colors.

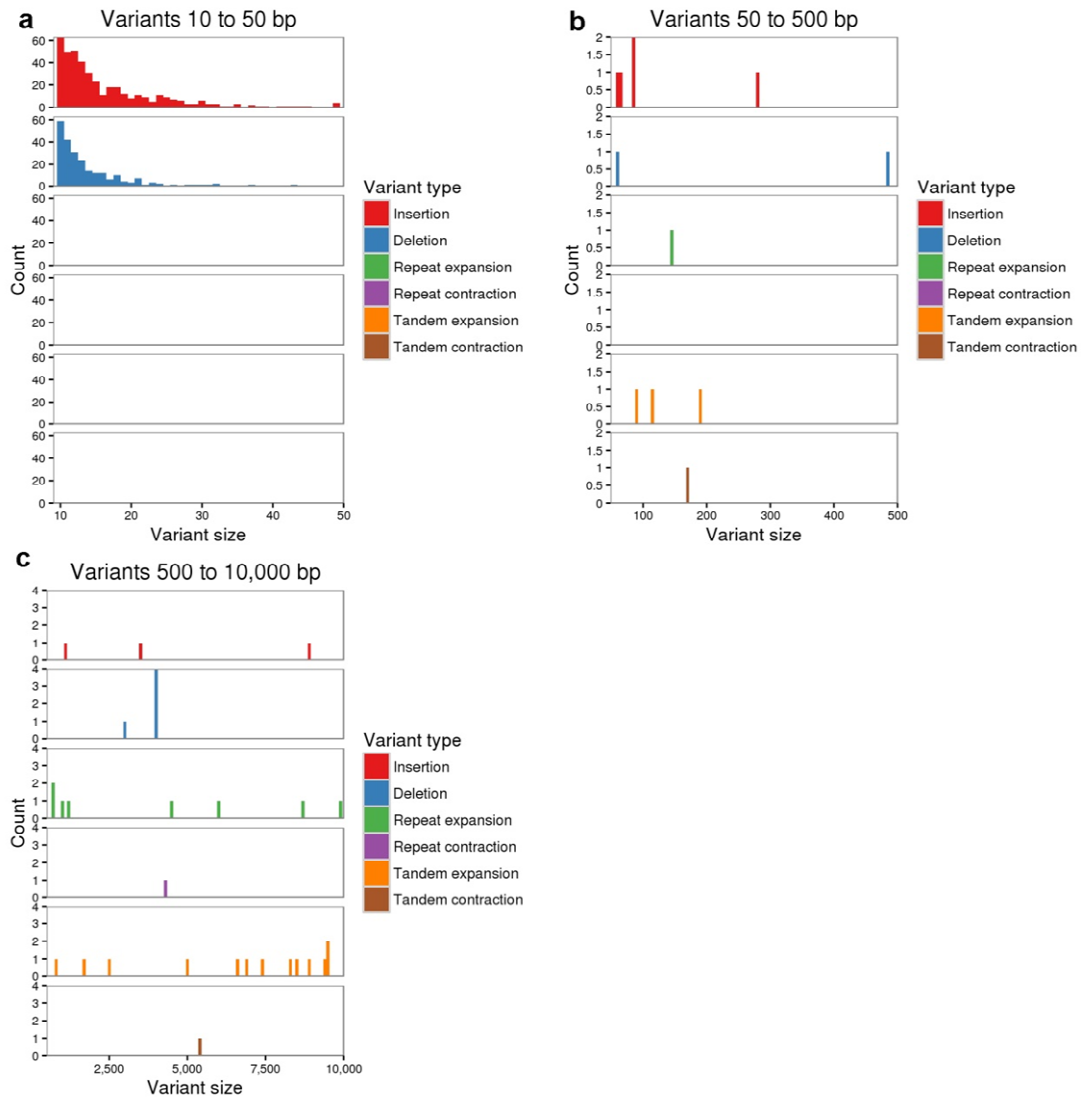

**Supplementary Figure 3. Number of genomic variants in different lengths detected between haplotigs and p-contigs. a** Variants from 10 to 50 bp; **b** variants from 50 to 500 bp; **c** variants from 500 to 10,000 bp.

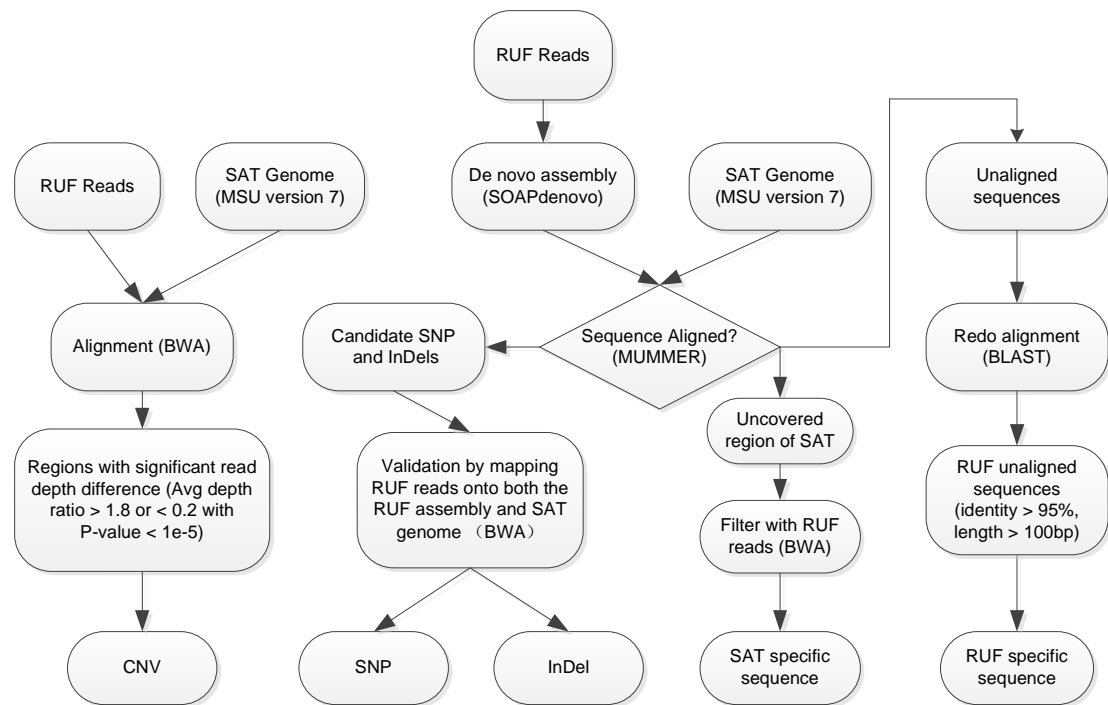

**Supplementary Figure 4. Flowchart for the detection of genomic variation between RUF and the Nipponbare genome.** This pipeline was also applied to the comparison between the NIV and Nipponbare genomes.

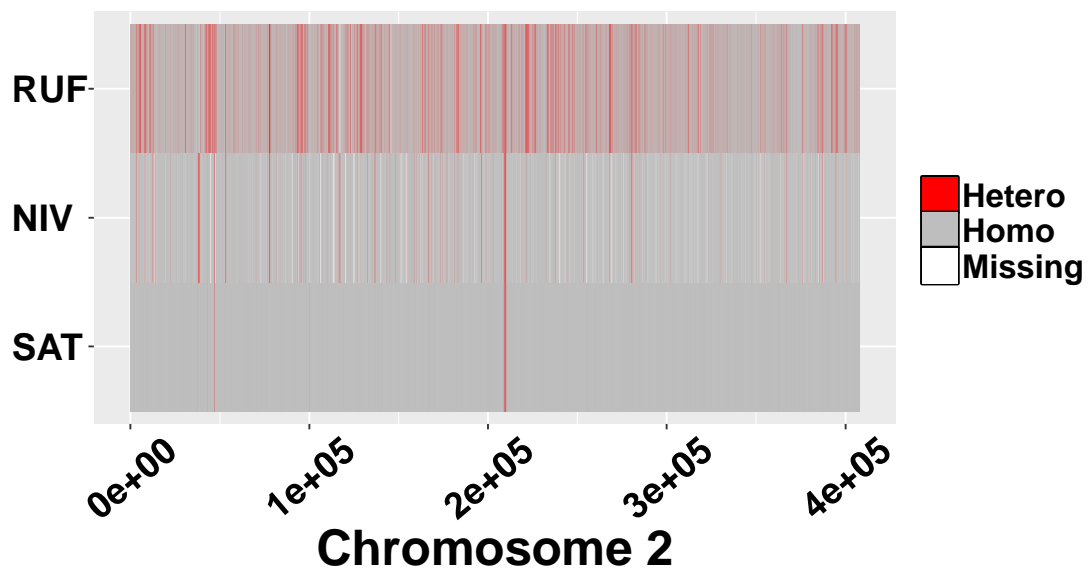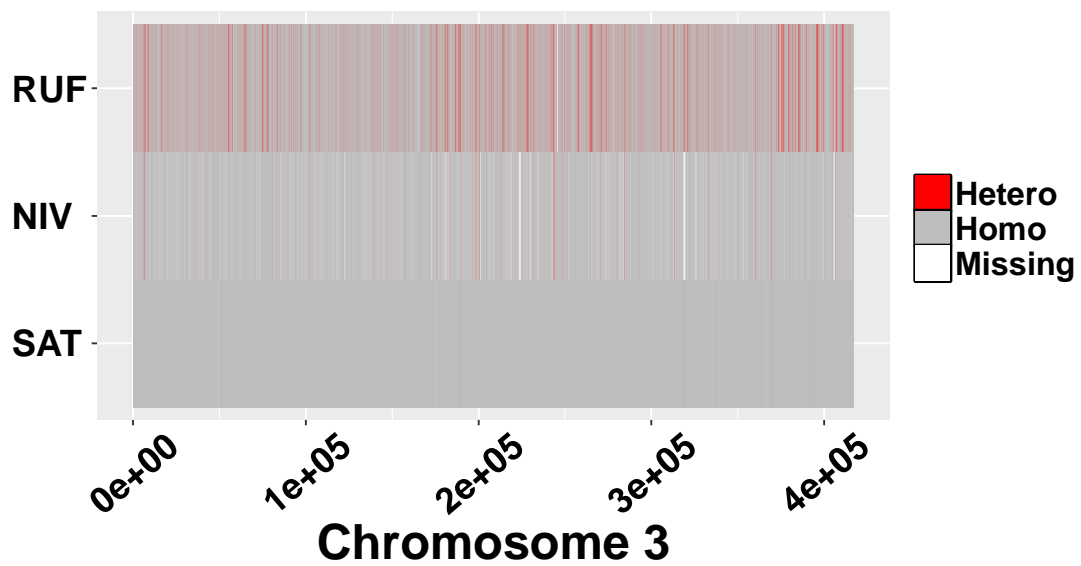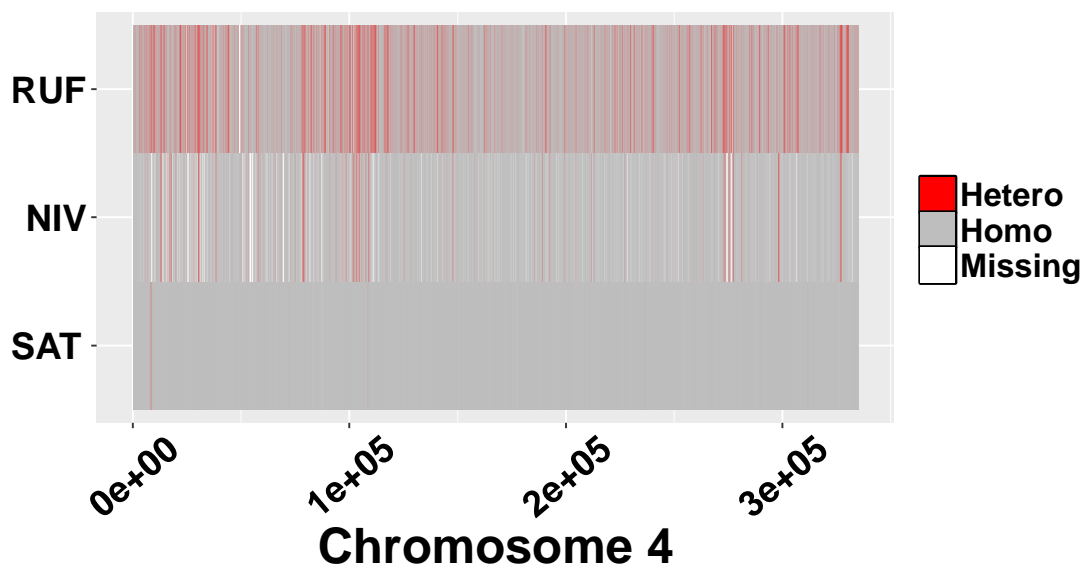

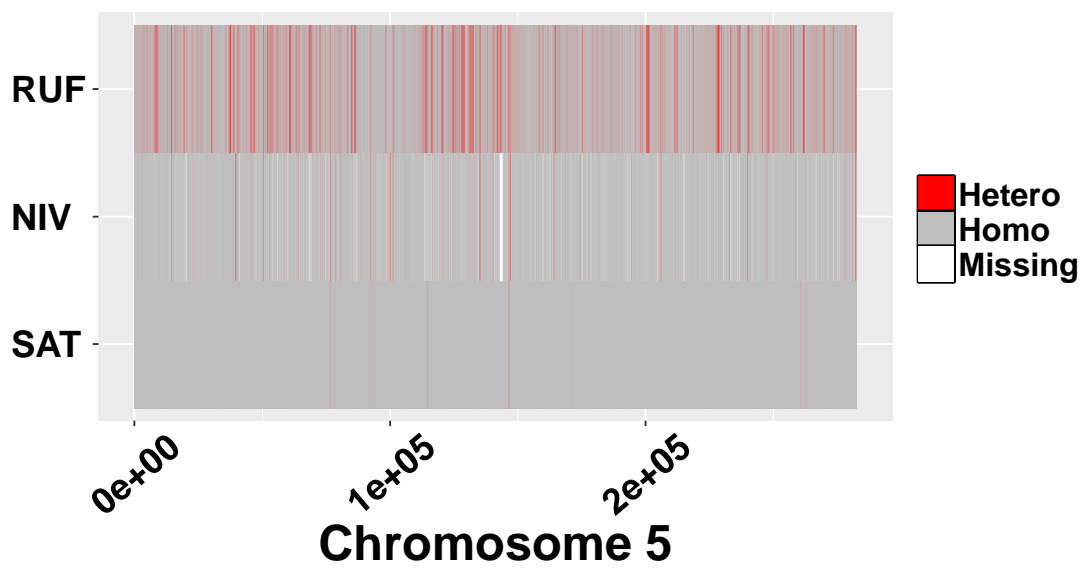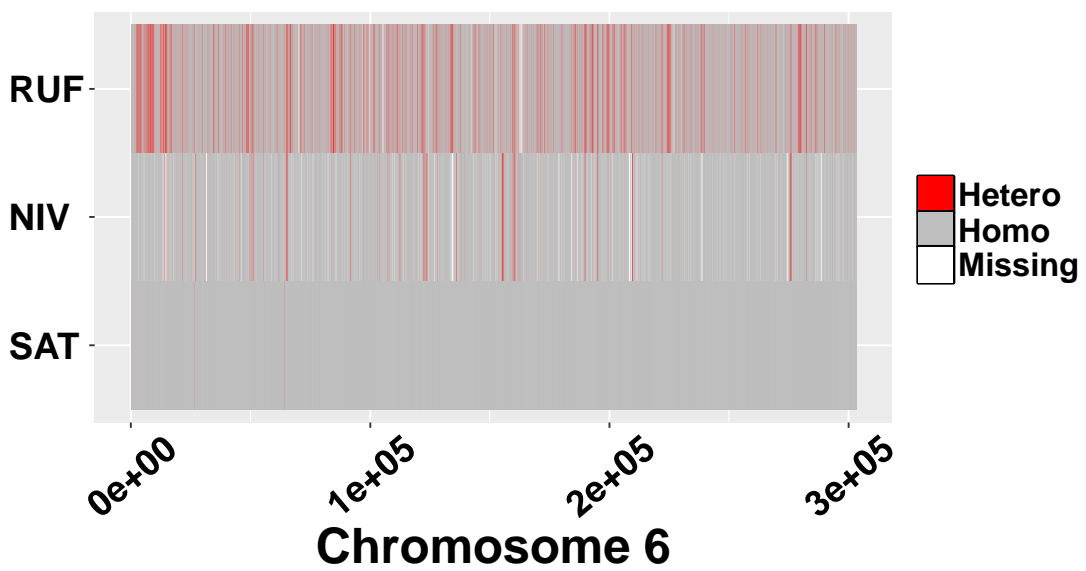

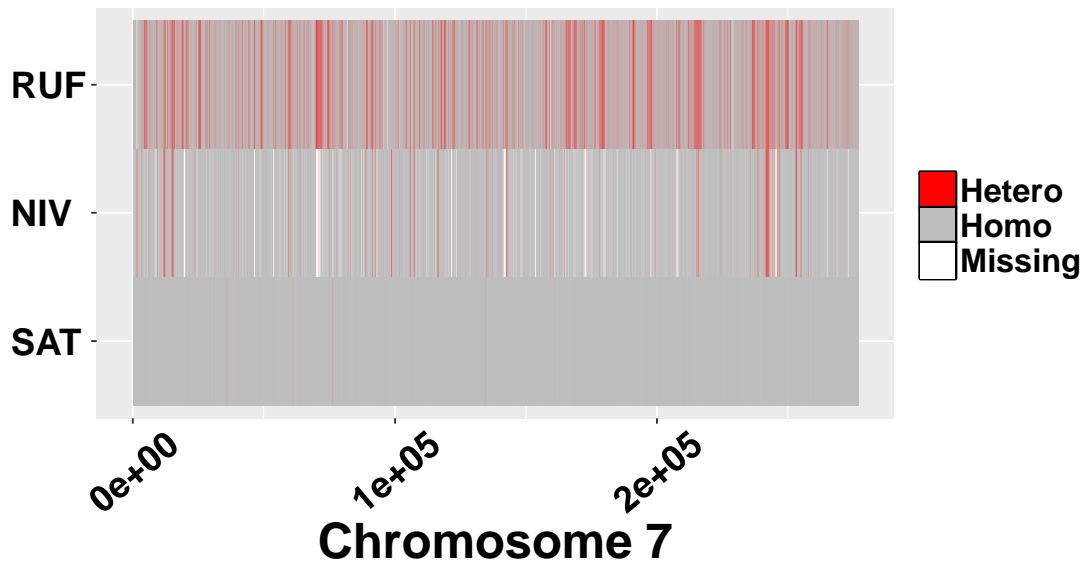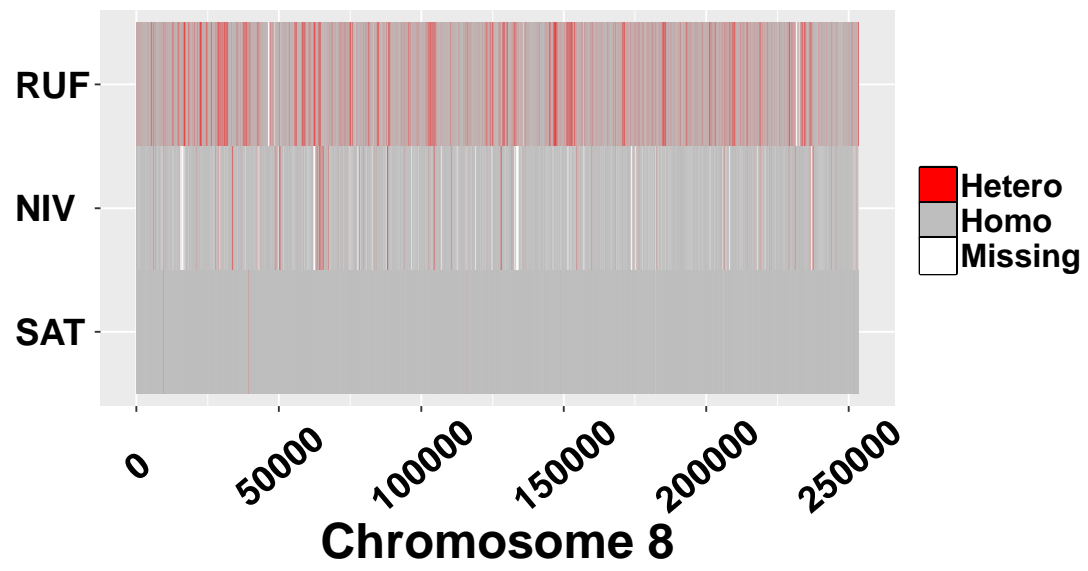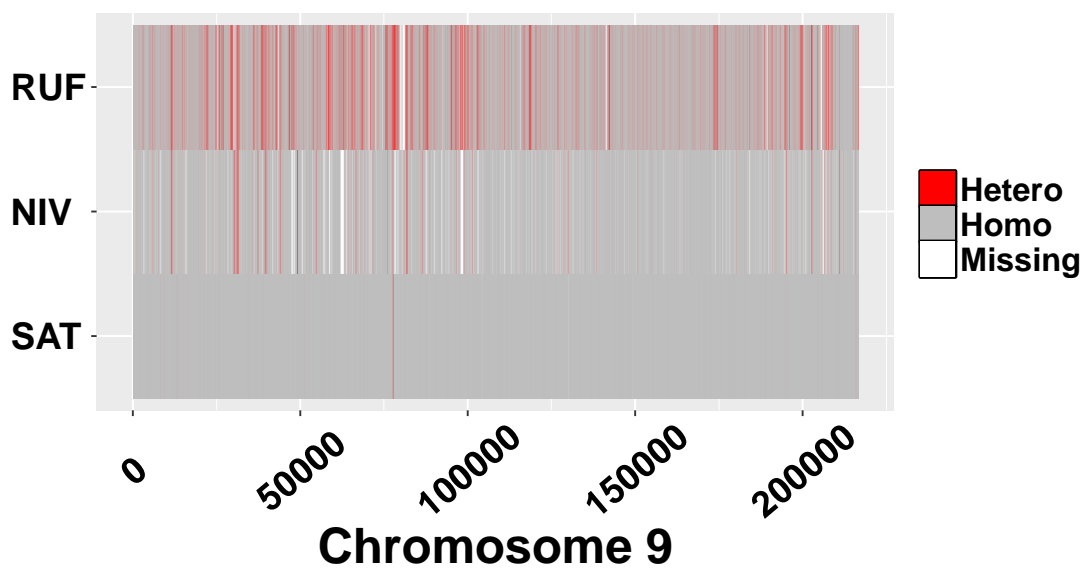

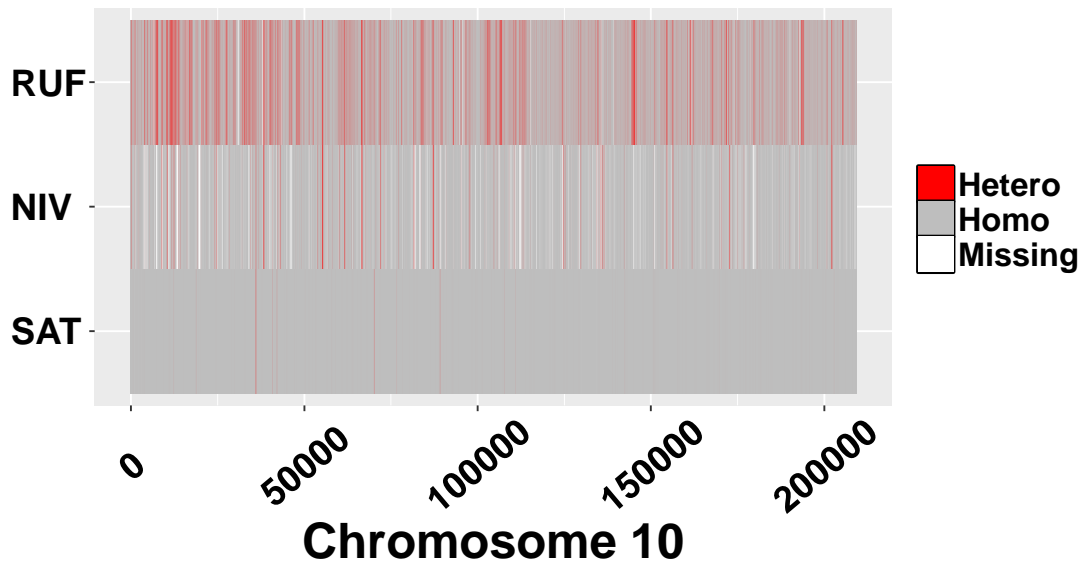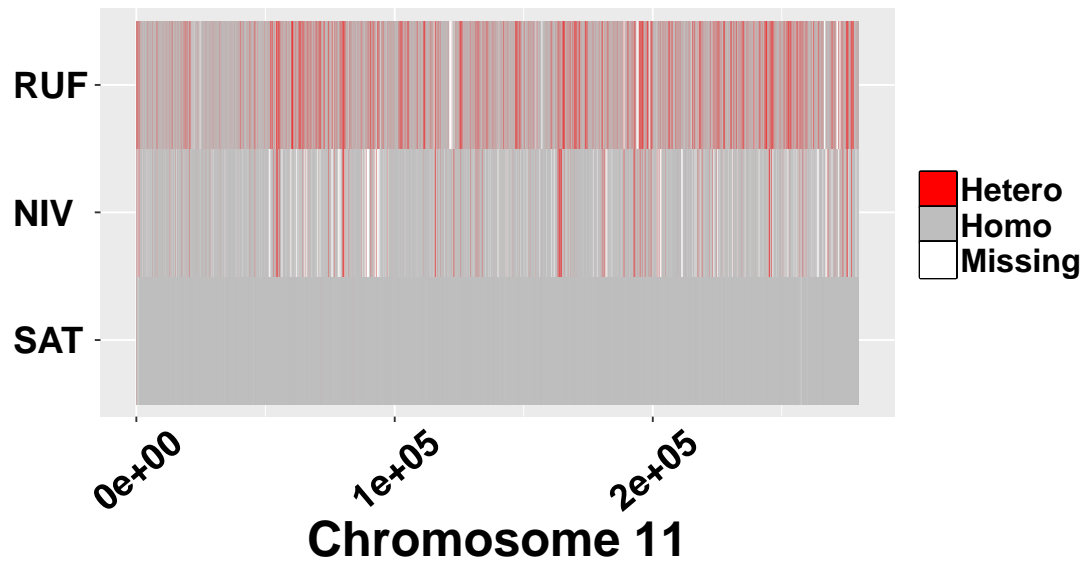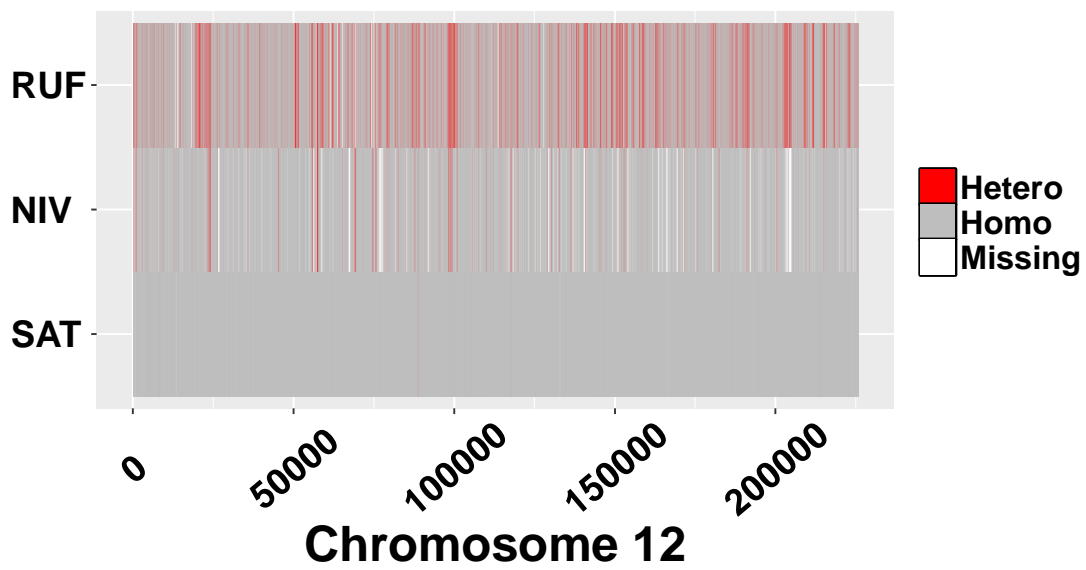



**Supplementary Figure 5. Patterns of single nucleotide polymorphisms along the 11 rice chromosomes among *O. rufipogon*, *O. nivara* and *O. sativa*.** Heterozygous and homozygous SNPs are shown with red and gray lines, respectively, while the unknown sites are indicated with white lines.

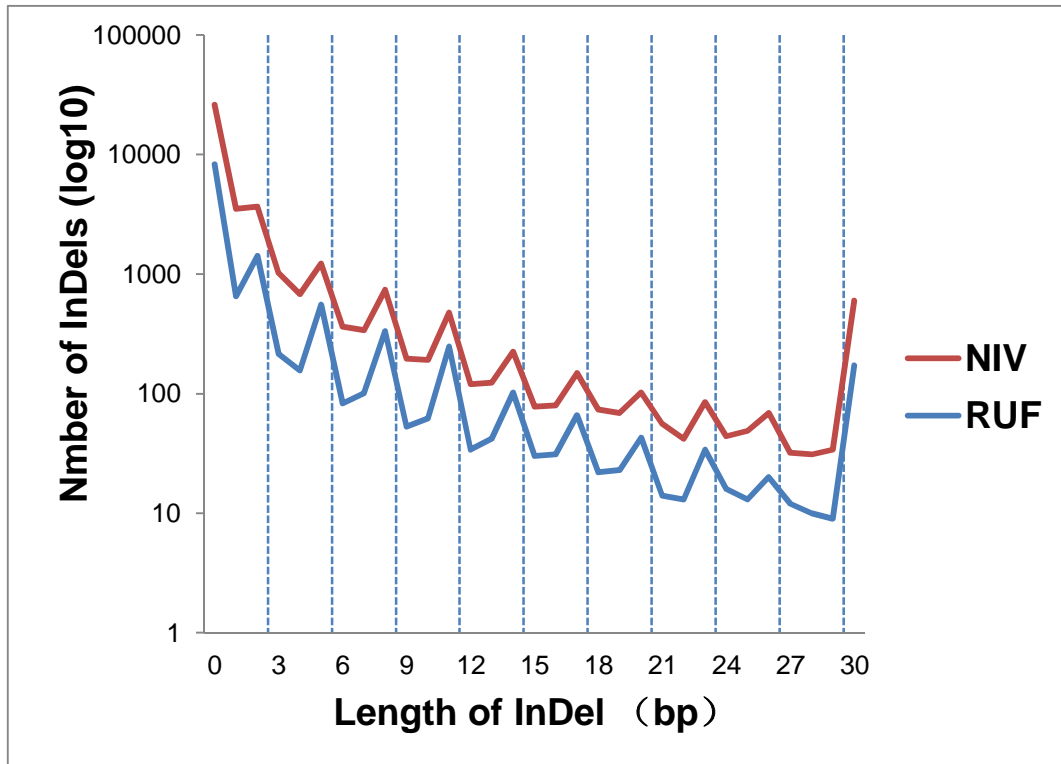

**Supplementary Figure 6. Length distribution of InDels located within CDS of *O. rufipogon* and *O. nivara*.** The peaks at positions that are multiples of three are shown by dashed vertical lines.

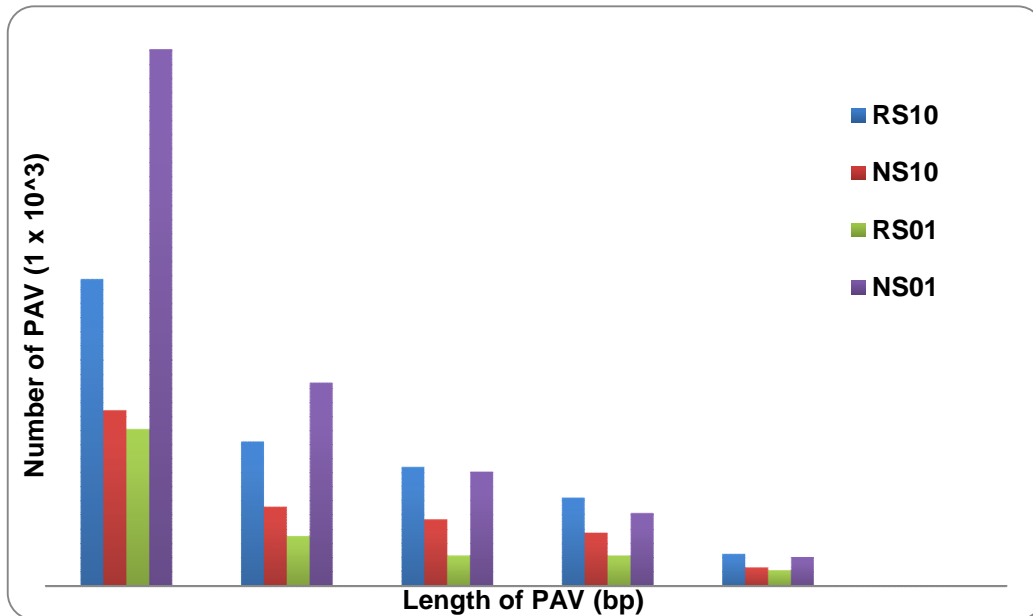

**Supplementary Figure 7. Summary of PAVs among *O. rufipogon*, *O. nivara* and *O. sativa*.** R: *O. rufipogon* (RUF); S: *O. sativa* (SAT); N: *O. nivara* (NIV); 1: presence; 0: absence. We defined and assigned four types of PAV: RS10 (presence in RUF but absence in SAT), RS01 (presence in SAT but absence in RUF), NS10 (presence in NIV but absence in SAT) and NS01 (presence in SAT but absence in NIV).

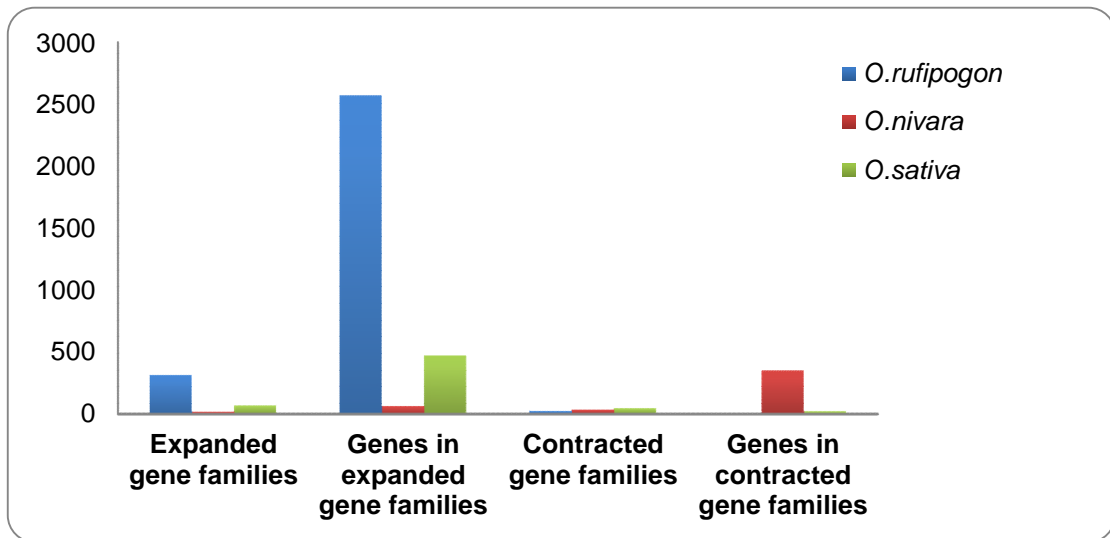

**Supplementary Figure 8. Summary of gene families expanded or contracted significantly ( $P < 0.01$ ) in terminal branches of *O. rufipogon*, *O. nivara* and *O. sativa*.**

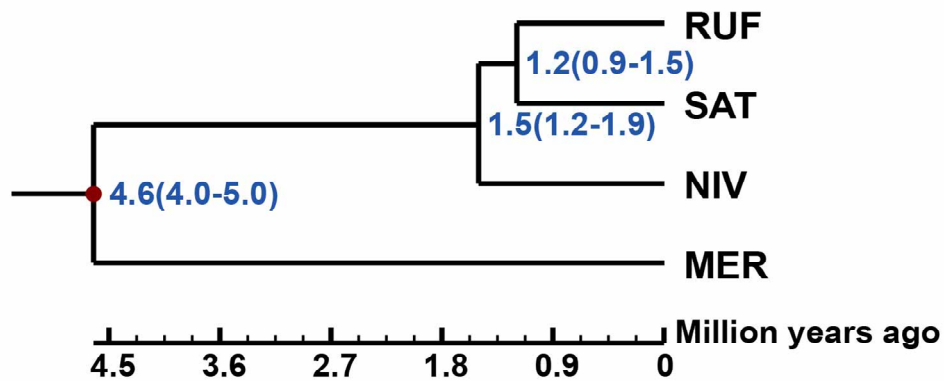

**Supplementary Figure 9. Phylogenetic relationships and divergence times of *O. rufipogon* (RUF), *O. nivara* (NIV) and *O. sativa* (SAT) using *O. meridionalis* (MER) as outgroup.** The phylogeny was inferred from 10,206 high-confidence 1:1 orthologous gene families based on the maximum likelihood method under the GTR+GAMMA model, and the divergence times were estimated using *mcmctree* program implemented in PAML. Note that all nodes are fully supported at 100%.

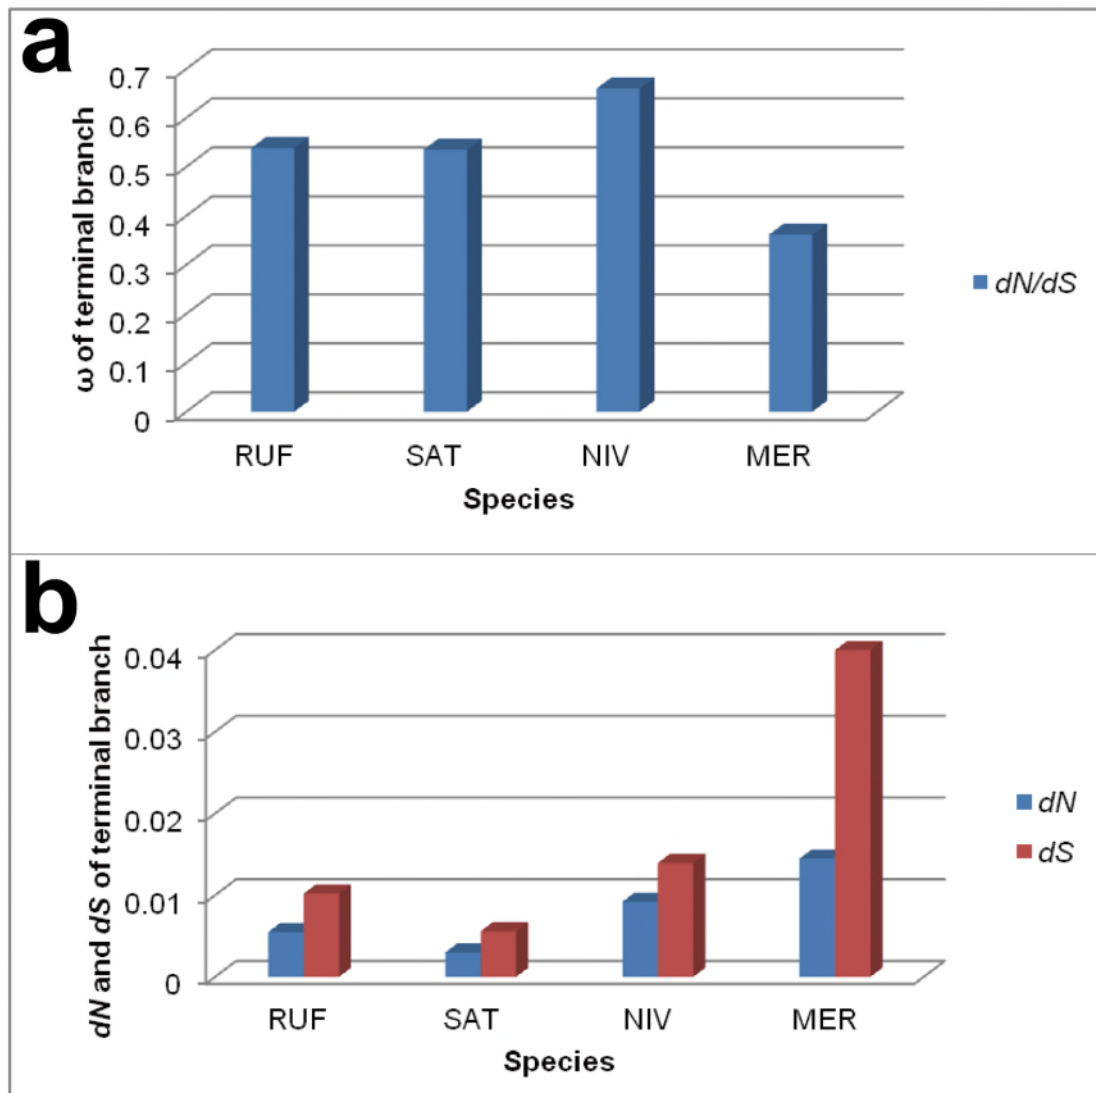

**Supplementary Figure 10. Branch-specific  $dN$ ,  $dS$  and  $\omega$  values in each terminal branch.** Shown are values of **a**  $\omega$  ( $dN/dS$ ); **b**  $dN$  and  $dS$  for each species, which were estimated in branch model tests.

## Supplementary Tables

Supplementary Table 1. Assembly statistics of the *O. rufipogon* genome.

|                                  | Assembler    |                  |                           |                                   |
|----------------------------------|--------------|------------------|---------------------------|-----------------------------------|
|                                  | Falcon-Unzip | Falcon-Unzip+10× | Falcon-Unzip+<br>10×+Hi-C | Falcon-Unzip+10<br>×+Hi-C+PBJelly |
| <b>Assembled Length<br/>(bp)</b> | 373,883,792  | 377,175,457      | 373,971,792               | 380,512,861                       |
| <b>Scaffold N50 (bp)</b>         | 710,332      | 2,214,952        | 29,494,264                | 30,197,710                        |
| <b>Scaffold N90 (bp)</b>         | 178,741      | 487,719          | 22,265,879                | 22,824,363                        |
| <b>Contig N50 (bp)</b>           | 710,332      | 710,332          | 710,332                   | 1,096,430                         |
| <b>Contig N90 (bp)</b>           | 178,741      | 178,741          | 178,741                   | 286,860                           |
| <b>Scaffold Number</b>           | 1,404        | 843              | 524                       | 524                               |
| <b>Contig Number</b>             | 1,404        | 1,404            | 1,404                     | 1,077                             |
| <b>Longest Scaffold (bp)</b>     | 4,290,542    | 7,550,243        | 43,695,925                | 44,260,698                        |
| <b>Longest Contig (bp)</b>       | 4,290,542    | 4,290,542        | 4,290,542                 | 4,409,078                         |

**Supplementary Table 2. Assembly results of p-contigs and haplotigs of the *O. rufipogon* genome..**

| <b>Sequences</b> | <b>Assembly length (Mb)</b> | <b>No. contigs</b> | <b>N50 length (Kb)</b> | <b>N90 length (Kb)</b> | <b>Max contig length (Kb)</b> |
|------------------|-----------------------------|--------------------|------------------------|------------------------|-------------------------------|
| <b>P-contigs</b> | 373.88                      | 1,404              | 710.33                 | 178.74                 | 4,290.54                      |
| <b>Haplotigs</b> | 23.85                       | 843                | 29.47                  | 18.51                  | 653.91                        |



**Supplementary Table 3. Scaffold length constitutions of *O. rufipogon*.**

| <b>Scaffold Length</b> | <b>Number</b> | <b>Scaffold Length (bp)</b> | <b>Average Length (bp)</b> | <b>Percentage (%)</b> |
|------------------------|---------------|-----------------------------|----------------------------|-----------------------|
| <b>&gt;1 Kb</b>        | 826           | 377,165,817                 | 456,617                    | 100.00                |
| <b>&gt;10 Kb</b>       | 600           | 375,914,405                 | 626,524                    | 99.67                 |
| <b>&gt;50 Kb</b>       | 331           | 370,046,179                 | 1,117,964                  | 98.11                 |
| <b>&gt;100 Kb</b>      | 290           | 367,168,813                 | 1,266,099                  | 97.35                 |
| <b>&gt;200 Kb</b>      | 252           | 361,676,028                 | 1,435,222                  | 95.89                 |
| <b>&gt;300 Kb</b>      | 230           | 356,507,333                 | 1,550,031                  | 94.52                 |
| <b>&gt;500 Kb</b>      | 184           | 337,877,604                 | 1,836,291                  | 89.58                 |
| <b>&gt;800 Kb</b>      | 141           | 311,420,982                 | 2,208,659                  | 82.57                 |
| <b>&gt;1 Mb</b>        | 122           | 294,593,993                 | 2,414,705                  | 78.11                 |
| <b>&gt;2 Mb</b>        | 59            | 204,848,868                 | 3,472,015                  | 54.31                 |
| <b>&gt;3 Mb</b>        | 29            | 132,571,336                 | 4,571,425                  | 35.15                 |

**Supplementary Table 4. Assembly statistics for the *O. rufipogon* genome sequences.**

| <b>Chromosome ID</b> | <b>Chromosome Length (RUF) (bp)</b> | <b>Chromosome length (Nipponbare) (bp)</b> |
|----------------------|-------------------------------------|--------------------------------------------|
| 1                    | 43,695,925                          | 43,270,923                                 |
| 2                    | 39,958,125                          | 35,937,250                                 |
| 3                    | 37,088,850                          | 36,413,819                                 |
| 4                    | 29,494,264                          | 35,502,694                                 |
| 5                    | 28,993,391                          | 29,958,434                                 |
| 6                    | 31,585,856                          | 31,248,787                                 |
| 7                    | 26,272,893                          | 29,697,621                                 |
| 8                    | 27,299,189                          | 28,443,022                                 |
| 9                    | 21,773,623                          | 23,012,720                                 |
| 10                   | 26,444,676                          | 23,207,287                                 |
| 11                   | 29,583,747                          | 29,021,106                                 |
| 12                   | 22,265,879                          | 27,531,856                                 |
| Unmapped             | 9,515,374                           | 0                                          |
| <b>Total</b>         | <b>373,971,792</b>                  | <b>373,245,519</b>                         |

**Supplementary Table 5. Statistics for large variants detected between haplotigs and p-contigs.**

| <b>Variant Type</b>       | <b>Count</b> | <b>Total length (bp)</b> |
|---------------------------|--------------|--------------------------|
| <b>Insertion</b>          | 429          | 21,114                   |
| <b>Deletion</b>           | 247          | 22,989                   |
| <b>Tandem_expansion</b>   | 16           | 85,296                   |
| <b>Tandem_contraction</b> | 2            | 5,617                    |
| <b>Repeat_expansion</b>   | 9            | 32,690                   |
| <b>Repeat_contraction</b> | 1            | 4,301                    |
| <b>Total</b>              | 704          | 172,007                  |

**Supplementary Table 6. Quality assessment of the *O. rufipogon* genome assembly using reads mapping, DNA, protein and EST datasets.**

|                                                | <b>Total</b> | <b>Aligned</b> | <b>Percentage (%)</b> |
|------------------------------------------------|--------------|----------------|-----------------------|
| <b>Reads mapping</b>                           |              |                |                       |
| PE reads                                       | 175,474,936  | 163,187,767    | 93.00                 |
| <b>Sequences available in public databases</b> |              |                |                       |
| DNA *                                          | 20,667       | 17,968         | 86.94                 |
| Protein **                                     | 3,762        | 2,424          | 64.43                 |
| <b>Transcripts of <i>O. rufipogon</i></b>      |              |                |                       |
| EST *                                          | 105,654      | 75,374         | 71.34                 |
| <b>BUSCOs from Embryophyta lineage***</b>      |              |                |                       |
| Complete                                       | 1,440        | 1,402          | 97.36                 |
| Duplicated                                     | 1,440        | 17             | 1.18                  |
| Fragmented                                     | 1,440        | 11             | 0.76                  |
| Missing                                        | 1,440        | 27             | 1.88                  |

\*Aligned using GMAP (version 2014-10-22), and the hits with identity  $\geq 90\%$  && coverage  $\geq 90\%$  are retained.

\*\*Aligned using genBlastA (version 1.0.1), and the hits with identity  $\geq 80\%$  && coverage  $\geq 90\%$  are retained.

\*\*\*The 1,440 BUSCO conserved genes used were collected from Embryophyta lineage.

**Supplementary Table 7. Summary of gene prediction for *O. rufipogon*.**

| <b>Type</b>     |                                     | <b>Values</b> |
|-----------------|-------------------------------------|---------------|
|                 | Total number of predicted genes (#) | 34,830        |
|                 | Total number of gene models (#)     | 34,830        |
|                 | Average gene length (bp)            | 2,921         |
| <b>Gene</b>     | Average CDS length (bp)             | 1,125         |
| <b>Features</b> | Average exons per gene              | 4.5           |
|                 | Average exon length (bp)            | 248           |
|                 | Average intron length (bp)          | 507           |

**Supplementary Table 8. Validation of gene models of *O. rufipogon* by using homologous proteins and RNA-Seq datasets.**

| <b>Evidence</b>                       | <b>Resources</b> | <b>Number</b> | <b>% Percent</b> |
|---------------------------------------|------------------|---------------|------------------|
| Total predicted genes                 | This study       | 34,589        | 100              |
| Homologous protein supported*         | <i>O. sativa</i> | 24,711        | 71.44            |
| RNA-Seq supported**                   | This study       | 21,515        | 62.20            |
| Homology protein or RNA-Seq supported |                  | 29,123        | 84.20            |

Note: Blast with e-value  $< 1e^{-5}$  was used for searching against database;

\* Identity  $\geq 30\%$  and Coverage  $\geq 80\%$ ;

\*\* Identity  $\geq 90\%$  and Coverage  $\geq 50\%$

**Supplementary Table 9. Summary of non-coding RNA genes in the *O. rufipogon*.**

| <b>Type</b> | <b>Number</b> | <b>Average Length<br/>(bp)</b> | <b>Total Length<br/>(bp)</b> | <b>% of<br/>Genome</b> |
|-------------|---------------|--------------------------------|------------------------------|------------------------|
| tRNA        | 637           | 75                             | 47,862                       | 0.0127                 |
| rRNA (8S)   | 976           | 116                            | 113,091                      | 0.0300                 |
| rRNA (18S)  | 56            | 1,814                          | 101,573                      | 0.0269                 |
| rRNA (28S)  | 53            | 3,933                          | 208,438                      | 0.0553                 |
| SnoRNA      | 442           | 120                            | 53,026                       | 0.0141                 |
| snRNA       | 117           | 143                            | 16,713                       | 0.0044                 |
| miRNA       | 245           | 140                            | 34,236                       | 0.0091                 |

Supplementary Table 10. Statistics of repeat sequence in the *O. rufipogon* genome.

|                                | Length<br>(bp) | Percentage (%) |
|--------------------------------|----------------|----------------|
| <b>Transposable Elements</b>   | 166467134      | 44.14          |
| <b>DNA transposons</b>         | 56904501       | 15.09          |
| <i>En-Spm</i>                  | 13033370       | 3.46           |
| <i>Harbinger</i>               | 5602726        | 1.49           |
| <i>MuDR</i>                    | 15643183       | 4.15           |
| <i>TcMar-Stowaway</i>          | 3271049        | 0.87           |
| <i>Tourist</i>                 | 14,711         | 0.00           |
| <i>hAT</i>                     | 3900448        | 1.03           |
| <i>Helitron</i>                | 11628837       | 3.08           |
| <b>Other</b>                   | 3810177        | 1.01           |
| <b>Retrotransposon</b>         | 102758700      | 27.24          |
| <b>Non-LTR Retrotransposon</b> | 5174466        | 1.37           |
| <b>LINE</b>                    | 4498862        | 1.19           |
| <b>SINE</b>                    | 675604         | 0.18           |
| <b>LTR Retrotransposon</b>     | 97584234       | 25.87          |
| <i>Copia</i>                   | 11212454       | 2.97           |
| <i>Gypsy</i>                   | 58639158       | 15.55          |
| <b>Other*</b>                  | 27732622       | 7.35           |
| <b>Other Repeats</b>           | 6803933        | 1.80           |
| <b>Satellite</b>               | 1168           | 0.00           |
| <b>Simple repeats</b>          | 4799297        | 1.27           |
| <b>Unknown</b>                 | 2003468        | 0.53           |

\* Non-autonomous LTR retrotransposons.



**Supplementary Table 11. Occurrence of simple sequence repeats (SSRs) in the *O. rufipogon* genome.**

| <b>Repeat type</b> | <b>Number</b>  | <b>Proportion (%)</b> | <b>Total length (Kb)</b> | <b>Average length (bp)</b> |
|--------------------|----------------|-----------------------|--------------------------|----------------------------|
| Mononucleotide     | 16,790         | 7.67                  | 238.82                   | 14                         |
| Dinucleotide       | 39,838         | 18.19                 | 964.59                   | 24                         |
| Trinucleotide      | 84,516         | 38.60                 | 1,190.43                 | 14                         |
| Tetranucleotide    | 49,983         | 22.83                 | 659.63                   | 13                         |
| Pentanucleotide    | 16,967         | 7.75                  | 271.29                   | 16                         |
| Hexanucleotide     | 10,873         | 4.97                  | 208.58                   | 19                         |
| <b>Total</b>       | <b>218,967</b> | <b>100.00</b>         | <b>3,533.34</b>          | <b>16</b>                  |

**Supplementary Table 12. Assembly statistics of *O. rufipogon*, *O.sativa* and *O. nivara* genome.**

---

|                                 | <i>O.sativa</i> | <i>O. nivara</i> | <i>O. rufipogon</i> |
|---------------------------------|-----------------|------------------|---------------------|
| <b>Sequencing technology</b>    | Sanger          | Illumina         | PacBio              |
| <b>Completeness (BUSCO) (%)</b> | 98.2            | 95.4             | 97.36               |
| <b>Contig N50 (bp)</b>          | 7,711,345       | 13,868           | 1,096,430           |
| <b>Scaffold N50 (bp)</b>        | 29,958,434      | 506,802          | 30,197,710          |
| <b>Total length (bp)</b>        | 374,471,240     | 379,501,719      | 380,512,861         |
| <b>Protein No.</b>              | 39,045          | 41,490           | 34,830              |

---

**Supplementary Table 13. Summary of the pan-genome of *O. rufipogon*, *O. sativa* and *O. nivara*.**

|                               | <b>Sequence length (bp)</b> |
|-------------------------------|-----------------------------|
| Shared among RUF, NIV and SAT | 317,729,226                 |
| Shared between RUF and NIV    | 349,534,715                 |
| Shared between RUF and SAT    | 342,883,315                 |
| Shared between NIV and SAT    | 336,486,012                 |
| RUF-specific                  | 98,013,406                  |
| NIV-specific                  | 11,210,218                  |
| SAT-specific                  | 12,831,139                  |
| Pan-genome                    | 515,500,353                 |

Note: *O. sativa* is abbreviated as SAT, *O. rufipogon* is abbreviated as RUF and *O. nivara* is abbreviated as NIV.

**Supplementary Table 14. Enrichment of core and dispensable genes in various GO categories.**

|                          | <b>GO term</b>                                           | <b>Frequency<br/>in core genes</b> | <b>Frequency<br/>in<br/>dispensable<br/>genes</b> | <b><i>P</i>-value</b> | <b>FDR</b> |
|--------------------------|----------------------------------------------------------|------------------------------------|---------------------------------------------------|-----------------------|------------|
| <b>Core genes</b>        |                                                          |                                    |                                                   |                       |            |
| BP                       | Biological regulation                                    | 0.0988                             | 0.0747                                            | 2.19E-06              | 2.63E-05   |
| BP                       | Regulation of biological<br>process                      | 0.0970                             | 0.0739                                            | 5.05E-06              | 3.03E-05   |
| CP                       | Cell                                                     | 0.1165                             | 0.0923                                            | 1.13E-05              | 4.51E-05   |
| CP                       | Cell part                                                | 0.1165                             | 0.0923                                            | 1.13E-05              | 3.38E-05   |
| BP                       | Cellular component<br>organization or<br>biogenesis      | 0.0261                             | 0.0166                                            | 2.57E-04              | 6.18E-04   |
| BP                       | Localization                                             | 0.0859                             | 0.0699                                            | 7.08E-04              | 1.42E-03   |
| BP                       | Cellular process                                         | 0.3798                             | 0.3527                                            | 1.21E-03              | 2.08E-03   |
| BP                       | Single-organism process                                  | 0.2467                             | 0.2230                                            | 1.31E-03              | 1.97E-03   |
| CP                       | Organelle                                                | 0.0784                             | 0.0646                                            | 1.95E-03              | 2.60E-03   |
| MF                       | Nucleic acid binding<br>transcription factor<br>activity | 0.0353                             | 0.0267                                            | 4.23E-03              | 5.07E-03   |
| CP                       | Membrane part                                            | 0.0675                             | 0.0596                                            | 4.11E-02              | 4.48E-02   |
| MF                       | Protein binding<br>transcription factor<br>activity      | 0.0036                             | 0.0020                                            | 4.86E-02              | 4.86E-02   |
| <b>Dispensable genes</b> |                                                          |                                    |                                                   |                       |            |
| BP                       | Reproductive process                                     | 0.0026                             | 0.0123                                            | 9.26E-11              | 9.26E-10   |
| BP                       | Multi-organism process                                   | 0.0031                             | 0.0127                                            | 3.69E-10              | 1.85E-09   |
| BP                       | Multicellular organismal<br>process                      | 0.0054                             | 0.0150                                            | 3.91E-08              | 1.30E-07   |
| MF                       | Nutrient reservoir<br>activity                           | 0.0025                             | 0.0073                                            | 4.98E-05              | 1.24E-04   |
| MF                       | Structural molecule<br>activity                          | 0.0136                             | 0.0216                                            | 4.01E-04              | 8.03E-04   |
| MF                       | Catalytic activity                                       | 0.4345                             | 0.4578                                            | 5.62E-03              | 9.37E-03   |
| BP                       | Growth                                                   | 0.0004                             | 0.0016                                            | 2.09E-02              | 2.98E-02   |
| MF                       | Enzyme regulator<br>activity                             | 0.0090                             | 0.0123                                            | 4.27E-02              | 5.34E-02   |
| MF                       | Electron carrier activity                                | 0.0087                             | 0.0119                                            | 4.53E-02              | 5.03E-02   |
| MF                       | Metallochaperone<br>activity                             | 0.0000                             | 0.0004                                            | 4.96E-02              | 4.96E-02   |

**Supplementary Table 15. Summary of genomic variation among *O. sativa*, *O. rufipogon* and *O. nivara*.**

**A. Combined method of genome comparison and reads mapping analysis**

| Species | Genomic Variation |                 |              |               |
|---------|-------------------|-----------------|--------------|---------------|
|         | Number of SNP     | Number of InDel | Number of SV | Number of CNV |
| RUF     | 4,997,466         | 817,238         | 16,163       | 5,017         |
| NIV     | 3,794,980         | 779,252         | 19,914       | 7,766         |
| SAT     | 23,584            | 2,764           | 1,879        | 2,034         |

Note: Numbers of SNP and InDel were obtained from whole genome comparisons and reads mapping analysis; SV and CNV calling was only based on reads mapping analysis.

**B. Genome comparison method**

| Species | Genomic Variation |                 |
|---------|-------------------|-----------------|
|         | Number of SNP     | Number of InDel |
| RUF     | 2,887,048         | 551,018         |
| NIV     | 3,093,758         | 619,797         |

Note: SNP and InDel calling are based on whole genome alignments.

**C. Reads mapping method**

| Species | Genomic Variation |                 |              |               |
|---------|-------------------|-----------------|--------------|---------------|
|         | Number of SNP     | Number of InDel | Number of SV | Number of CNV |
| RUF     | 4,065,179         | 403,544         | 16,163       | 5,017         |
| NIV     | 2,841,519         | 319,771         | 19,914       | 7,766         |
| SAT     | 23,584            | 2,764           | 1,879        | 2,034         |

Note: *O. sativa* is abbreviated as SAT, *O. rufipogon* is abbreviated as RUF and *O. nivara* is abbreviated as NIV.

**Supplementary Table 16. Annotation of genomic variation among *O. sativa*, *O. rufipogon* and *O. nivara*.**

**A. SNP annotation**

| Species | Number of SNP              |                                |                           |                           |
|---------|----------------------------|--------------------------------|---------------------------|---------------------------|
|         | Number of Synonymous Sites | Number of Non-synonymous Sites | Number of Stop codon Gain | Number of Stop codon Loss |
| RUF     | 339,831                    | 446,309                        | 17,124                    | 2,218                     |
| NIV     | 238,642                    | 349,519                        | 14,083                    | 1,730                     |

**B. InDel annotation**

| Species | Number of InDel           |                           |                      |                          |
|---------|---------------------------|---------------------------|----------------------|--------------------------|
|         | Number of Stop codon Loss | Number of Stop codon Gain | Number of FrameShift | Number of Non-FrameShift |
| RUF     | 109                       | 920                       | 25,139               | 14,614                   |
| NIV     | 88                        | 1,242                     | 41,038               | 13,568                   |

**C. CNV annotation**

| Species | Number of CNV      |                       |
|---------|--------------------|-----------------------|
|         | Number of Deletion | Number of Duplication |
| RUF     | 3,355              | 1,662                 |
| NIV     | 3,562              | 4,204                 |
| SAT     | 1,806              | 228                   |

Note: Deletion and duplication refer that copy number fewer and more than in the reference genome, respectively.

**D. SV annotation**

| Species | SV             |                    |                     |                     |                |                      |                          |
|---------|----------------|--------------------|---------------------|---------------------|----------------|----------------------|--------------------------|
|         | Number of ICT1 | Number of Deletion | Number of Insertion | Number of Inversion | Number of ITC2 | Number of Exon       |                          |
|         |                |                    |                     |                     |                | Number of FrameShift | Number of Non-FrameShift |
| RUF     | 52             | 12,035             | 0                   | 465                 | 621            | 4,539                | 266                      |
| NIV     | 185            | 13,655             | 2,524               | 384                 | 431            | 4,660                | 554                      |
| SAT     | 3              | 47                 | 1,357               | 26                  | 20             | 228                  | 91                       |

Note: ICT1 refers to Intra-chromosome translocation; ITX2 refers to Inter-chromosome translocation. SVs that occur within the exon regions were classified them into two types, frameshift and non-frameshift. *O. sativa* is abbreviated as SAT, *O. rufipogon* is abbreviated as RUF and *O. nivara* is abbreviated as NIV.

**Supplementary Table 17. Shared and sample-specific genes affected by CNVs in the *O. rufipogon* and *O. nivara* genomes.**

|                  | Number of shared genes |       |
|------------------|------------------------|-------|
|                  | N=2                    | N=1   |
| <b>Loss</b>      | 88                     | 940   |
| <b>Gain</b>      | 145                    | 6,940 |
| <b>Loss/Gain</b> | 86                     | -     |
| <b>Total</b>     | 319                    | 7,880 |

**Supplementary Table 18. Numbers of MADS-box genes affected by CNVs and total MADS-box genes from whole genome of *O. sativa*.**

| MADS-box type             | Affected by CNVs | Whole genome |
|---------------------------|------------------|--------------|
| M- $\alpha$               | 4                | 13           |
| M- $\beta$                | 2                | 9            |
| M- $\gamma$               | 0                | 10           |
| <b>Type I (subtotal)</b>  | 6                | 32           |
| MIKC <sup>C</sup>         | 15               | 37           |
| MIKC*                     | 2                | 5            |
| <b>Type II (subtotal)</b> | 17               | 42           |
| <b>Total</b>              | 23               | 74           |



**Supplementary Table 19. The 23 MADS-box genes affected by CNVs in *O. sativa*.**

| <b>Gene ID</b> | <b>Physical location</b> | <b>Type</b> | <b>#Wild species</b> | <b>MADS-box type</b> |
|----------------|--------------------------|-------------|----------------------|----------------------|
| LOC_Os01g10504 | 5559548-5568844          | CNV-gain    | 1                    | MIKCC                |
| LOC_Os01g66290 | 38500880-38505127        | CNV-gain    | 1                    | MIKCC                |
| LOC_Os01g67890 | 39459599-39461050        | CNV-gain    | 1                    | M-beta               |
| LOC_Os01g69850 | 40344329-40364584        | CNV-gain    | 1                    | MIKC*                |
| LOC_Os02g07430 | 3833129-3837135          | CNV-gain    | 1                    | MIKCC                |
| LOC_Os02g36924 | 22294657-22301808        | CNV-gain    | 1                    | MIKCC                |
| LOC_Os02g52340 | 32038902-32045130        | CNV-gain    | 1                    | MIKCC                |
| LOC_Os03g11614 | 6052750-6061369          | CNV-gain    | 1                    | MIKCC                |
| LOC_Os04g23910 | 13672710-13675884        | CNV-gain    | 1                    | MIKCC                |
| LOC_Os04g31804 | 19042703-19058654        | CNV-gain    | 1                    | M-alpha              |
| LOC_Os04g52410 | 31143083-31144886        | CNV-gain    | 1                    | MIKCC                |
| LOC_Os05g23780 | 13656346-13657002        | CNV-gain    | 1                    | M-alpha              |
| LOC_Os06g06750 | 3162801-3169415          | CNV-gain    | 1                    | MIKCC                |
| LOC_Os06g45650 | 27637555-27641578        | CNV-gain    | 1                    | MIKCC                |
| LOC_Os07g04170 | 1781625-1785426          | CNV-gain    | 1                    | M-beta               |
| LOC_Os07g41370 | 24788476-24793884        | CNV-gain    | 1                    | MIKCC                |
| LOC_Os08g02070 | 679358-681739            | CNV-gain    | 1                    | MIKCC                |
| LOC_Os08g20440 | 12272625-12277708        | CNV-gain    | 1                    | M-alpha              |
| LOC_Os08g33488 | 20897215-20906881        | CNV-gain    | 1                    | MIKCC                |
| LOC_Os08g41950 | 26507180-26512261        | CNV-gain    | 1                    | MIKCC                |
| LOC_Os11g43740 | 26414394-26418442        | CNV-gain    | 1                    | MIKC*                |
| LOC_Os12g10540 | 5584593-5590285          | CNV-gain    | 1                    | MIKCC                |
| LOC_Os12g21850 | 12303478-12304062        | CNV-gain    | 1                    | M-alpha              |

**Supplementary Table 20. Numbers of flowering-related genes affected by CNVs and total flowering-related genes from whole genome of *O. sativa*.**

| Flowering-related genes | Affected by CNVs | Whole genome |
|-------------------------|------------------|--------------|
| <i>CAB</i>              | 4                | 14           |
| <i>CCA</i>              | 5                | 18           |
| <i>CDF</i>              | 0                | 5            |
| <i>CO</i>               | 1                | 7            |
| <i>COP</i>              | 1                | 1            |
| <i>CRY</i>              | 1                | 6            |
| <i>ELF</i>              | 0                | 3            |
| <i>FKF</i>              | 0                | 1            |
| <i>FT</i>               | 4                | 18           |
| <i>GI</i>               | 1                | 1            |
| <i>LFY</i>              | 0                | 1            |
| <i>LHY</i>              | 0                | 1            |
| <i>Lux</i>              | 6                | 29           |
| <i>PHOT</i>             | 6                | 27           |
| <i>PHY</i>              | 2                | 3            |
| <i>PIF_PIL</i>          | 0                | 2            |
| <i>PRR</i>              | 3                | 19           |
| <i>SOC</i>              | 17               | 53           |
| <i>TOC</i>              | 0                | 1            |
| <i>ZTL</i>              | 2                | 4            |
| <b>Total</b>            | <b>53</b>        | <b>210</b>   |

\* Flowering-related genes in rice were detected using BLASTP (Identity  $\geq$  30% && Coverage  $\geq$  70%) based on the homologous protein sequences from *Arabidopsis thaliana*.

**Supplementary Table 21. Rice flower development pathway-associated genes affected by CNVs.**

| <b>GeneID</b>  | <b>Physical location</b> | <b>Type</b> | <b>Function</b>                                               | <b>Symbol</b> |
|----------------|--------------------------|-------------|---------------------------------------------------------------|---------------|
| LOC_Os01g07790 | 3737893-3740685          | CNV-gain    | Polygalacturonase, putative, expressed                        | <i>PG</i>     |
| LOC_Os01g23740 | 13353629-13357510        | CNV-gain    | OsPDIL2-2 protein disulfide isomerase PDIL2-2, expressed      | <i>PDIL</i>   |
| LOC_Os02g34850 | 20899808-20907175        | CNV-gain    | Histone-lysine N-methyltransferase ASHH2, putative, expressed | <i>ASHH2</i>  |
| LOC_Os03g18200 | 10204819-10210306        | CNV-gain    | Heat shock protein DnaJ, putative, expressed                  | <i>TMS1</i>   |
| LOC_Os04g34450 | 20862474-20872470        | CNV-gain    | Expressed protein                                             | <i>SEC5</i>   |
| LOC_Os04g49450 | 29500951-29503775        | CNV-gain    | MYB family transcription factor, putative, expressed          | <i>LHY</i>    |
| LOC_Os05g05310 | 2611683-2617251          | CNV-gain    | Fibronectin type III domain containing protein, expressed     | <i>VIL1</i>   |
| LOC_Os07g06970 | 3429443-3434747          | CNV-gain    | HEN1, putative, expressed                                     | <i>HEN1</i>   |
| LOC_Os09g13610 | 7914083-7925405          | CNV-gain    | PFT1, putative, expressed                                     | <i>PFT1</i>   |
| LOC_Os10g02770 | 1092789-1096966          | CNV-gain    | Glycosyl hydrolases family 16, putative, expressed            | <i>XTH</i>    |
| LOC_Os10g27470 | 14487133-14493136        | CNV-gain    | KH domain containing protein, putative, expressed             | <i>PEP</i>    |

**Supplementary Table 22. Number of *R*-genes affected by CNVs and total *R*-genes from whole genome of *O. sativa*.**

| Type       | Located in CNV region | Whole genome |
|------------|-----------------------|--------------|
| CC-NBS     | 8                     | 30           |
| CC-NBS-LRR | 34                    | 73           |
| NBS-LRR    | 96                    | 322          |
| TIR-NBS    | 1                     | 1            |
| NBS only   | 57                    | 186          |
| Total      | 196                   | 612          |

**Supplementary Table 23. Summary of PAV calling between *O. sativa* and *O. rufipogon*, *O. sativa* and *O. nivara*, respectively.** PAV types are represented in a customized format, of which RS10 indicates that a PAV is present RUF but absent in SAT, NS10 indicates that a PAV is present NIV but absent in SAT, RS01 indicates that a PAV is absent RUF but present in SAT, and NS01 indicates a PAV is absent in NIV but present in SAT.

| <b>PAV</b>  | <b>Number of PAVs</b> |         |          |           |           |            | <b>Total</b>  |
|-------------|-----------------------|---------|----------|-----------|-----------|------------|---------------|
|             | <b>Type</b>           | 100-500 | 501-1000 | 1001-2000 | 2001-5000 | 5001-20000 |               |
| <b>RS10</b> | 11,255                | 5,310   | 4,362    | 3,236     | 1,198     | 26         | <b>25,387</b> |
| <b>RS01</b> | 5,773                 | 1,845   | 1,148    | 1,143     | 599       | 11         | <b>10,519</b> |
| <b>NS10</b> | 6,448                 | 2,888   | 2,431    | 1,962     | 702       | 8          | <b>14,439</b> |
| <b>NS01</b> | 19,735                | 7,477   | 4,192    | 2,670     | 1,083     | 24         | <b>35,181</b> |

**Supplementary Table 24. Summary of PAV calling between *O. sativa* and *O. rufipogon*, *O. sativa* and *O. nivara*, respectively.**

| <b>PAV Type</b> | <b>Length of PAV regions<br/>(bp)</b> | <b>Gene number<br/>in PAV regions</b> | <b>Gene number<br/>with known functions</b> |
|-----------------|---------------------------------------|---------------------------------------|---------------------------------------------|
| <b>RS10</b>     | 16,232,326                            | 4,621                                 | 3,018                                       |
| <b>RS01</b>     | 9,503,214                             | 3,241                                 | 1,123                                       |
| <b>NS10</b>     | 9,161,166                             | 3,076                                 | 1,701                                       |
| <b>NS01</b>     | 23,220,789                            | 14,425                                | 6,906                                       |

**Note:** R: *O. rufipogon*; S: *O. sativa*; N: *O. nivara*; 1: presence; 0: absence.

**Supplementary Table 25. Clustering of gene families among the three *Oryza* species, *O. sativa*, *O. rufipogon* and *O. nivara*.**

| <b>Species</b> | <b>Gene number</b> | <b>Genes in families</b> | <b>Unclustered genes</b> | <b>Family number</b> | <b>Unique families</b> | <b>Average gene number per family</b> |
|----------------|--------------------|--------------------------|--------------------------|----------------------|------------------------|---------------------------------------|
| <b>RUF</b>     | 48,445             | 36,902                   | 11,543                   | 25,391               | 1,007                  | 1.45                                  |
| <b>NIV</b>     | 38,881             | 29,911                   | 8,970                    | 24,095               | 437                    | 1.24                                  |
| <b>SAT</b>     | 39,043             | 33,425                   | 5,618                    | 26,043               | 239                    | 1.28                                  |

**Supplementary Table 26. Number of putative NBS-LRR genes identified in the three *Oryza* species, *O. sativa*, *O. rufipogon* and *O. nivara*.**

|              | <b>RUF</b> | <b>SAT</b> | <b>NIV</b> |
|--------------|------------|------------|------------|
| CC-NBS       | 76         | 56         | 64         |
| CC-NBS-LRR   | 166        | 252        | 133        |
| NBS-LRR      | 215        | 227        | 178        |
| TIR-NBS      | 1          | 1          | 1          |
| NBS          | 118        | 95         | 113        |
| <b>Total</b> | <b>576</b> | <b>631</b> | <b>489</b> |



**Supplementary Table 27. Summary of branch-specific  $\omega$ ,  $dN$ , and  $dS$  values along *O. rufipogon*, *O. sativa*, *O. nivara* and *O. meridionalis* lineages estimated by using PAML.**

| <b>Species/branch<sup>a</sup></b>  | <b><math>\omega(dN/dS)</math></b> | <b><math>dN</math></b> | <b><math>dS</math></b> |
|------------------------------------|-----------------------------------|------------------------|------------------------|
| <b>1# RUF</b>                      | 0.5382                            | 0.005491               | 0.010202               |
| <b>2# SAT</b>                      | 0.5352                            | 0.002995               | 0.005596               |
| <b>3# NIV</b>                      | 0.6598                            | 0.009203               | 0.013947               |
| <b>4# MER</b>                      | 0.3618                            | 0.014485               | 0.040033               |
| <b>5# Ancestral of RUF&amp;SAT</b> | 0.6333                            | 0.001826               | 0.002883               |

**Supplementary Table 28. Summary of the numbers of PSGs detected along *O. rufipogon*, *O. sativa* and *O. nivara* lineages estimated by using PAML.**

| Branch                            | All PSGs     |              | Lineage-specific PSGs <sup>c</sup> |            |
|-----------------------------------|--------------|--------------|------------------------------------|------------|
|                                   | P < 0.05     | FDR < 0.05   | P < 0.05                           | FDR < 0.05 |
| <sup>a</sup> All branches         | 1,905        | 1,799        | -                                  | -          |
| SAT                               | 273          | 247          | 103                                | 90         |
| NIV                               | 1,017        | 996          | 487                                | 476        |
| RUF                               | 440          | 416          | 211                                | 199        |
| <sup>b</sup> Ancestral of RUF&SAT | 250          | 235          | 53                                 | 50         |
| <b>Total (non-redundancy)</b>     | <b>2,148</b> | <b>2,053</b> | <b>854</b>                         | <b>815</b> |

<sup>a</sup> The genes under selection along any branch of the phylogenetic tree based on the site model;

<sup>b</sup> The branch leading to Asian cultivated rice and *O. rufipogon*;

<sup>c</sup> These genes show significant evidence of positive selection only along one branch.
